# Supplementary material for: Multi-functional porous organic polymers for highly-efficient solid-phase extraction of β-agonists and β-blockers in milk
Source: Royal Society of Chemistry journal article supplement (doi:10.1039/d1ra04481h), 2021-01-01
Supplement: d1ra04481h1.pdf [file d1ra04481h1.pdf]

# Supplementary Information for:

## Multi-functional porous organic polymers for high-efficient solid-phase extraction of $\beta$ -agonists and $\beta$ -blockers in milk

Ci Wu<sup>\*a, d</sup>, Xingshuang Ning<sup>c</sup>, Xi Chen<sup>c</sup>, Junfeng Ma<sup>d</sup>, Qun Zhao<sup>b</sup>, Li Zhao<sup>b</sup>, Guozhi Zhu<sup>b</sup>, Song Shi<sup>\*b</sup>

*a Liaoning Academy of Inspection and Quarantine, Dalian 116000, China;*

*b Dalian Institute of Chemical Physics, Chinese Academy of Sciences, Dalian, 116023, China;*

*c Dalian Customs of the People's Republic of China Technology Center, Dalian 116600, China;*

*d Department of Oncology, Lombardi Comprehensive Cancer Center, Georgetown University, Washington DC 20057, USA*

### Table of Contents

|                                                                                                                                                                                                  |            |
|--------------------------------------------------------------------------------------------------------------------------------------------------------------------------------------------------|------------|
| <b>Figure S1. Scanning electron micrographs of different PPOP, a magnification of 50000.....</b>                                                                                                 | <b>S-2</b> |
| <b>Figure S2. Transmission electron microscopy images of different PPOP, a magnification of 80000.....</b>                                                                                       | <b>S-3</b> |
| <b>Table S1. Linear relationship, Linear range, R<sup>2</sup>, LOQ and LOD for <math>\beta</math>-agonists and <math>\beta</math>-blockers measurement.....</b>                                  | <b>S-4</b> |
| <b>Table S2. The interday and intraday precisions achieved of <math>\beta</math>-agonists and <math>\beta</math>-blockers at spiking level of 5 ng·g<sup>-1</sup> in milk.....</b>               | <b>S-5</b> |
| <b>Table S3. Comparison of the proposed method based on PPOP with other analytical methods for the determination of <math>\beta</math>-agonists and <math>\beta</math>-blockers in milk.....</b> | <b>S-6</b> |
| <b>REFERENCES.....</b>                                                                                                                                                                           | <b>S-7</b> |

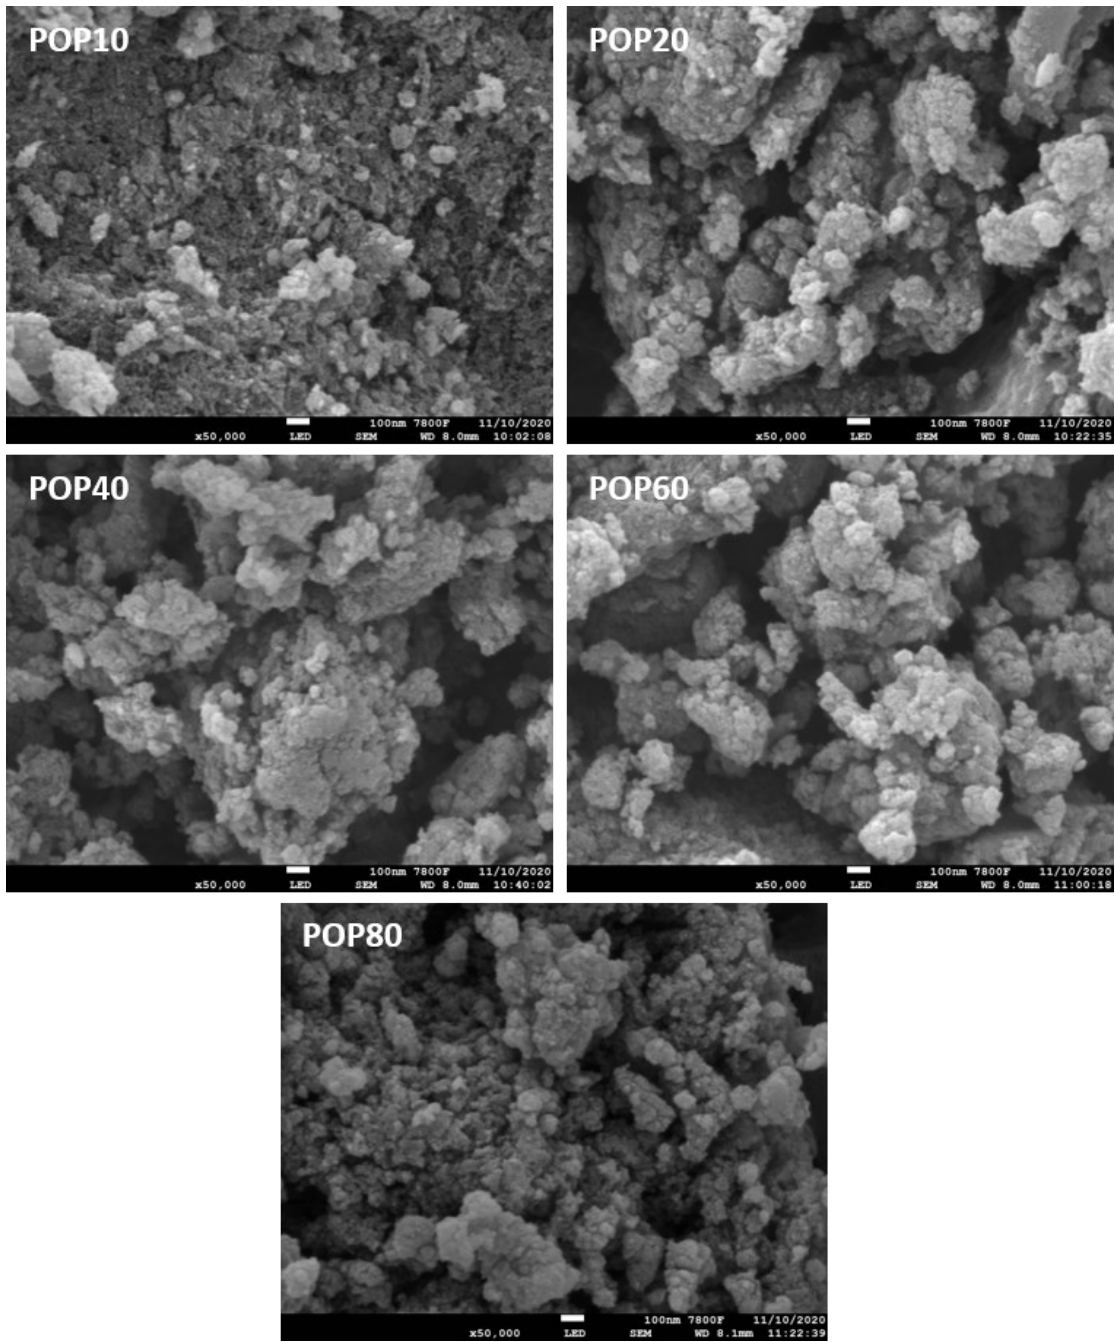

Figure S1. Scanning electron micrographs of different PPOP, a magnification of 50000

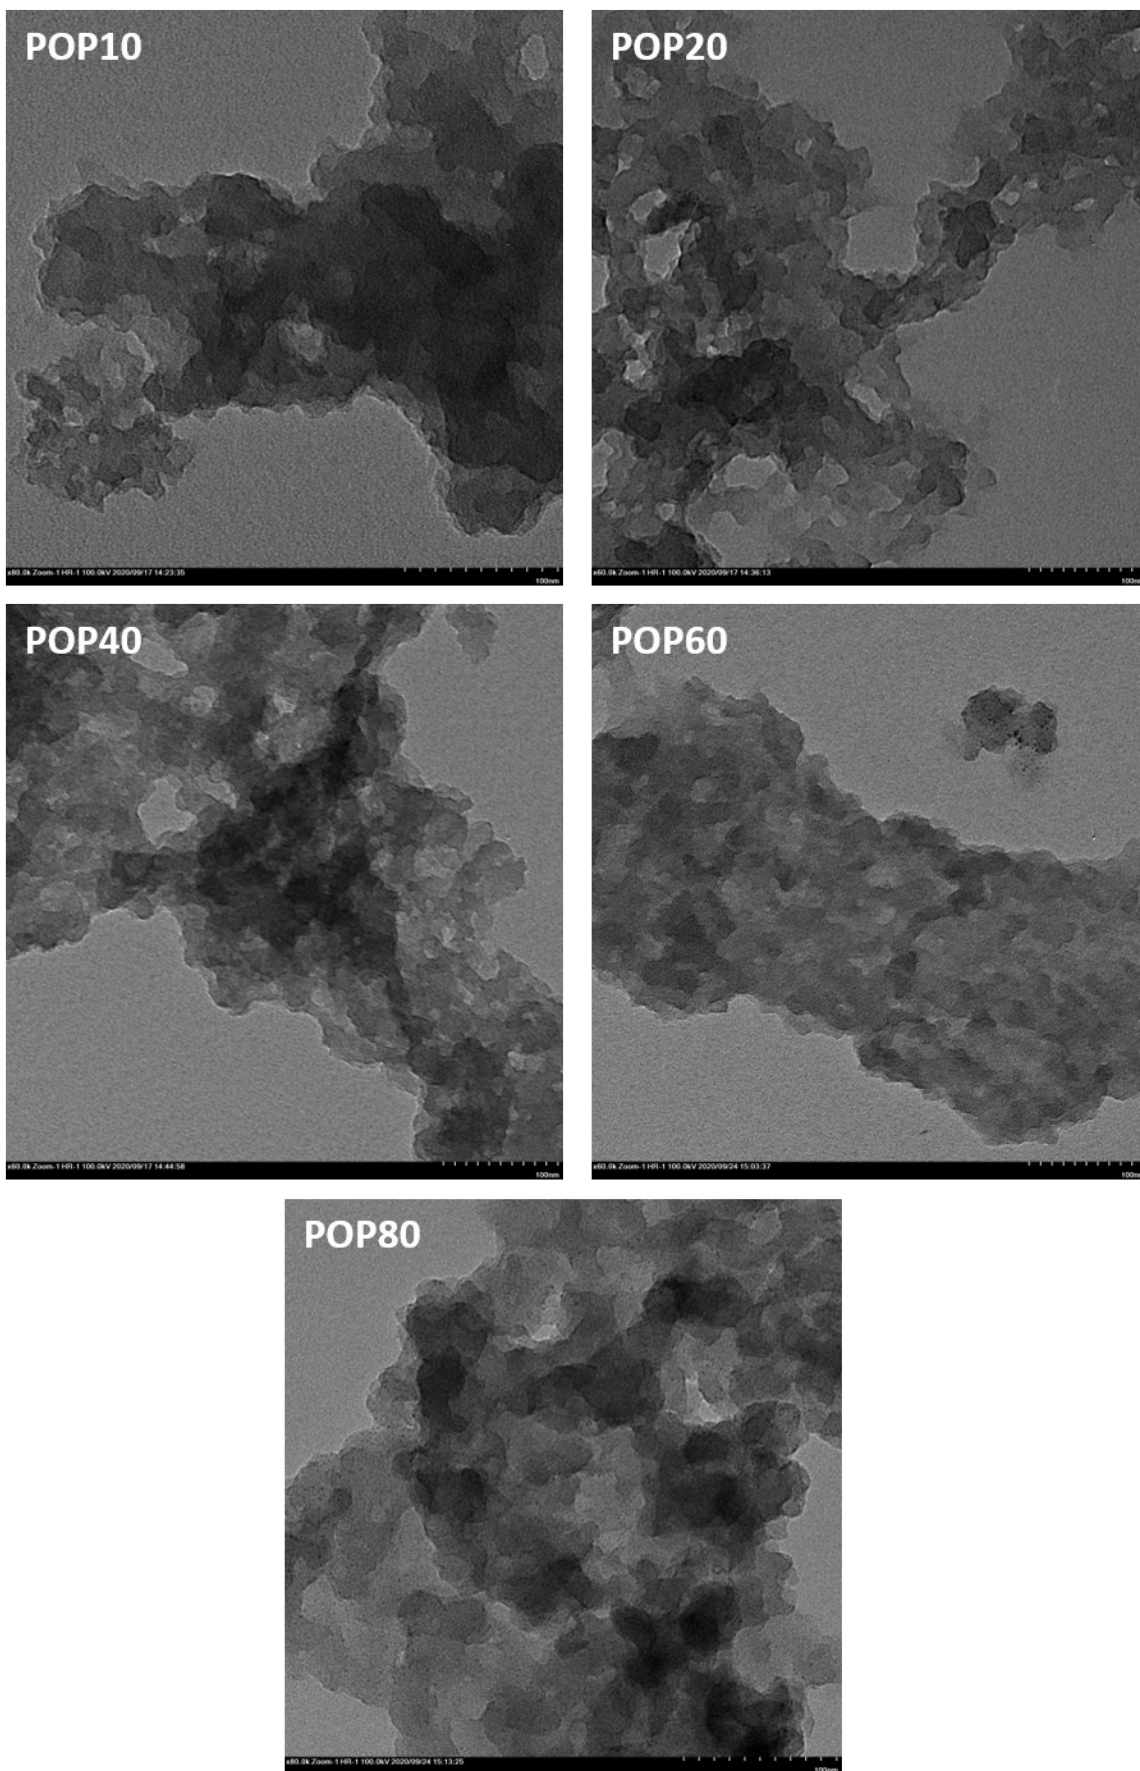

Figure S2. Transmission electron microscopy images of different PPOP, a magnification of 80000

Table S1. Linear relationship, Linear range, R<sup>2</sup>, LOQ and LOD for  $\beta$ -agonists and  $\beta$ -blocks measurement

|                       | <b>Compound</b> | <b>CAS</b>           | <b>Linear relationship</b> | <b>Linear range (ng·g<sup>-1</sup>)</b> | <b>R<sup>2</sup></b> | <b>LOQ (ng·g<sup>-1</sup>)</b> | <b>LOD (ng·g<sup>-1</sup>)</b> |
|-----------------------|-----------------|----------------------|----------------------------|-----------------------------------------|----------------------|--------------------------------|--------------------------------|
| $\beta$ -<br>Agonists | Ractopamine     | 97825-25-7           | Y=7738610+2902120*X        | 0.05-250                                | 0.9978               | 0.05                           | 0.02                           |
|                       | Salbutamol      | 18559-94-9           | Y=10267000+2136560*X       | 0.05-500                                | 0.9953               | 0.05                           | 0.02                           |
|                       | Terbutaline     | 23031-25-6           | Y=9637300+1981970*X        | 0.05-250                                | 0.9966               | 0.05                           | 0.02                           |
|                       | Cimaterol       | 54239-37-1           | Y=3981600+2286420*X        | 0.1-250                                 | 0.9990               | 0.1                            | 0.05                           |
|                       | Clenbuterol     | 37148-27-9           | Y=17544100+1910210*X       | 0.05-1000                               | 0.9958               | 0.05                           | 0.02                           |
|                       | Tulobuterol     | 41570-61-0           | Y=47793400+4923980*X       | 0.1-2500                                | 0.9966               | 0.1                            | 0.05                           |
|                       | Clorprenaline   | 3811-25-4            | Y=13140700+3503330*X       | 0.05-500                                | 0.9957               | 0.05                           | 0.02                           |
|                       | Cimbuterol      | 54239-39-3           | Y=54962500+1254910*X       | 0.05-5000                               | 0.9950               | 0.05                           | 0.02                           |
|                       | Brombuterol     | 41937-02-4           | Y=26814500+612003*X        | 0.25-5000                               | 0.9982               | 0.25                           | 0.1                            |
| Mabuterol             | 56341-08-3      | Y=92859200+1873960*X | 0.05-5000                  | 0.9955                                  | 0.05                 | 0.02                           |                                |
| $\beta$ -<br>Blockers | Nadolol         | 42200-33-9           | Y=1665400+2676120*X        | 0.05-500                                | 0.9988               | 0.05                           | 0.02                           |
|                       | Atenolol        | 29122-68-7           | Y=6373340+2352660*X        | 0.05-500                                | 0.9975               | 0.05                           | 0.02                           |
|                       | Sotalol         | 3930-20-9            | Y=362341+1654440*X         | 0.05-250                                | 0.9991               | 0.05                           | 0.02                           |
|                       | Betaxolol       | 63659-18-7           | Y=9030370+4606520*X        | 0.05-500                                | 0.9989               | 0.05                           | 0.02                           |
|                       | Propranolol     | 525-66-6             | Y=30536900+3760450*X       | 0.05-1000                               | 0.9959               | 0.05                           | 0.02                           |

Table S2. The inter-day and intraday precisions achieved of  $\beta$ -agonists and  $\beta$ -blockers at spiking level of  $5 \text{ ng}\cdot\text{g}^{-1}$  in milk.

|                   | <b>Compound</b> | <b>Inter-day RSD% (n=5)</b> | <b>Intraday RSD% (n=4)</b> |
|-------------------|-----------------|-----------------------------|----------------------------|
| $\beta$ -Agonists | Ractopamine     | 4.8                         | 3.9                        |
|                   | Salbutamol      | 3.0                         | 3.4                        |
|                   | Terbutaline     | 3.7                         | 6.1                        |
|                   | Cimaterol       | 1.7                         | 3.9                        |
|                   | Clenbuterol     | 2.4                         | 2.7                        |
|                   | Tulobuterol     | 4.6                         | 5.3                        |
|                   | Clorprenaline   | 4.4                         | 7.3                        |
|                   | Cimbuterol      | 11.7                        | 7.1                        |
|                   | Brombuterol     | 4.3                         | 8.6                        |
|                   | Mabuterol       | 8.5                         | 11.7                       |
| $\beta$ -Blockers | Nadolol         | 5.5                         | 2.6                        |
|                   | Atenolol        | 9.8                         | 12.2                       |
|                   | Sotalol         | 8.9                         | 2.6                        |
|                   | Betaxolol       | 8.1                         | 1.2                        |
|                   | Propranolol     | 4.3                         | 4.8                        |

Table S3. Comparison of the proposed method based on PPOP with other analytical methods for the determination of  $\beta$ -agonists and  $\beta$ -blockers in milk

| <b>Matrix</b> | <b>Target analyte number</b> | <b>Sample preparation</b>                                        | <b>Detection method</b> | <b>LOD (ng/g)</b> | <b>LOQ (ng/g)</b> | <b>Reference</b> |
|---------------|------------------------------|------------------------------------------------------------------|-------------------------|-------------------|-------------------|------------------|
| Raw milk      | 17                           | Extraction with ACN–ethanol with addition of EDTA                | UPLC–ESI–MS/MS          | -                 | 0.05-0.2          | 1                |
| Milk          | 6                            | Modified QuEChERS approach                                       | UPLC-Q-TOF-MS           | 0.46-1.46         | 1.53-4.87         | 2                |
| Milk powder   | 3                            | Solid–liquid extraction step with ultrasonic-assisted extraction | LC-ESI-MS/MS            | -                 | 0.09-0.66         | 3                |
| Bovine milk   | 8                            | Mixed-mode cation exchange SPE                                   | UPLC-Q-Trap-MS          | 0.2               | 0.5               | 4                |
| Milk          | 15                           | PPOP SPE                                                         | UPLC-Orbitrap-MS        | 0.02-0.1          | 0.05-0.25         | This work        |

## REFERENCES

- (1) Zhan, J.; Yu, X.-J.; Zhong, Y.-Y.; Zhang, Z.-t.; Cui, X.-m.; Peng, J.-F.; Feng, R.; Liu, X.-T.; Zhu, Y. *J. Chromatogr. B* **2012**, *906*, 48-57.
- (2) Zhang, Y.; Li, X.; Liu, X.; Zhang, J.; Cao, Y.; Shi, Z.; Sun, H. *J. Dairy Sci.* **2015**, *98*, 8433-8444.
- (3) Dasenaki, M. E.; Thomaidis, N. S. *Anal. Chim. Acta* **2015**, *880*, 103-121.
- (4) Xiao, X.; Zhang, M.-M.; Wang, Z.-Q. *Anal. Lett.* **2019**, *52*, 439-451.
